# Supplementary material for: A linear deep-blue bipolar fluorescent material with the CIEy < 0.065 serving as the emitter and host for high-performance monochromatic and hybrid white OLEDs
Source: Royal Society of Chemistry journal article supplement (doi:10.1039/d2tc01928k), 2022-01-01
Supplement: d2tc01928k1.pdf [file d2tc01928k1.pdf]

## Supporting Information

### **A Linear Deep-Blue Bipolar Fluorescent Material with the CIE<sub>y</sub> < 0.065 Serving as Emitter and Host for High-Performance Monochromatic and Hybrid White OLEDs**

Ling Peng<sup>a</sup>, Yumiao Huo<sup>d</sup>, Shuyao He<sup>a</sup>, Yuchao Liu<sup>a</sup>, Zhongjie Ren<sup>c</sup>, Shian Ying<sup>a,b\*</sup>, Shouke Yan<sup>a,c\*</sup>

<sup>a</sup> Key Laboratory of Rubber-Plastics, Ministry of Education, Qingdao University of Science & Technology, Qingdao 266042, P. R. China.

<sup>b</sup> Institute of Polymer Optoelectronic Materials and Devices, State Key Laboratory of Luminescent Materials and Devices, South China University of Technology, Guangzhou 510640, P. R. China.

<sup>c</sup> State Key Laboratory of Chemical Resource Engineering, College of Materials Science and Engineering, Beijing University of Chemical Technology, Beijing 100029, P. R. China.

<sup>d</sup> College of Materials Science and Engineering, Shandong University of Science and Technology, Qingdao 266590, P. R. China.

\*Corresponding author: [shian0610@126.com](mailto:shian0610@126.com); [skyan@mail.buct.edu.cn](mailto:skyan@mail.buct.edu.cn)

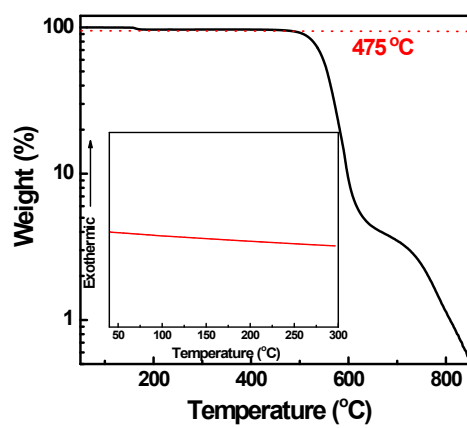

**Fig. S1.** TGA curve of the compound **P2MPC**. Inset: DSC curve of the compound **P2MPC**.

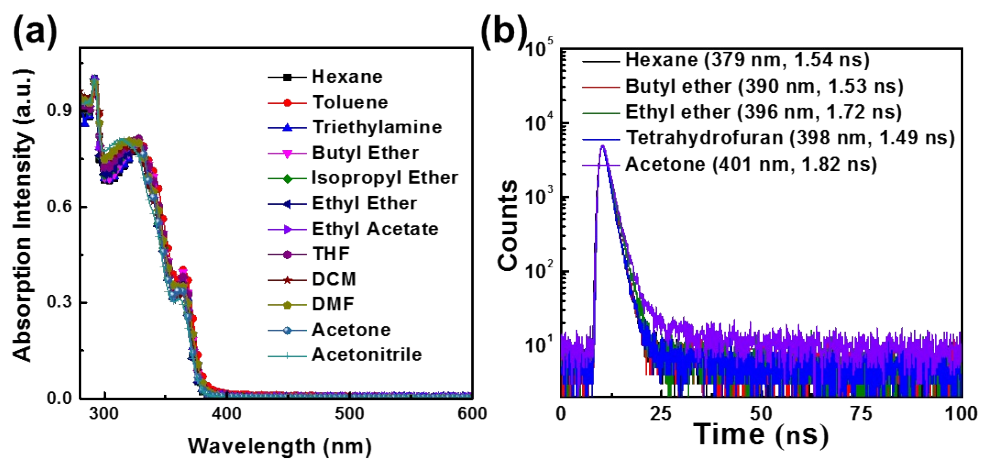

**Fig. S2.** (a) Absorption spectra of **P2MPC** in the different solvents. (b) Time-resolved PL decay curves in different solvents (10  $\mu\text{M}$ ).

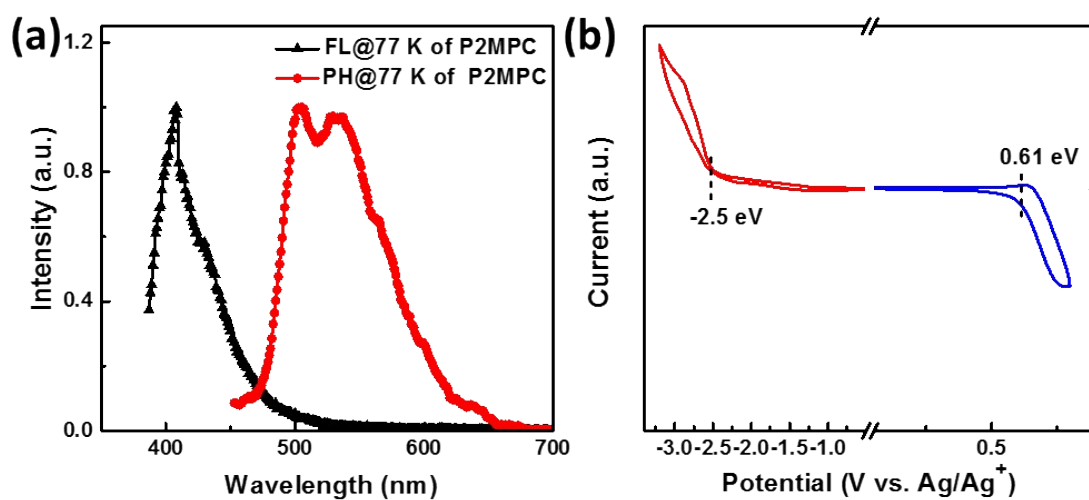

**Fig. S3.** (a) Fluorescent and phosphorescent spectra of **P2MPC** in dichloromethane solution at 77 K. (b)

Cyclic voltammograms curves of **P2MPC**.

## Lippert-Mataga Calculation

The Stokes shift ( $\nu_A - \nu_{PL}$ ) versus orientational polarizability ( $(\epsilon, n)$ ) of solvents can be constructed by the Lippert-Mataga model with the Equation 1 as below.

$$hc(\nu_A - \nu_{PL}) = hc(\nu_A^0 - \nu_{PL}^0) + \frac{2(\mu_e - \mu_g)^2}{a_0^3} f(\epsilon, n) \quad (1)$$

Here,  $h$  is the Plank constant,  $c$  is the light speed in vacuum,  $\mu_g$  and  $\mu_e$  are the ground-state excited-state dipole moments,  $(\epsilon, n)$  is the orientational polarizability of solvents,  $a_0$  is the Onsager cavity radius,  $\nu_A^0 - \nu_{PL}^0$  is the Stokes shifts when  $f$  is zero, respectively.

Take differential on both sides of the Equation 1, the Equation 2 can be obtained:

$$\mu_e = \mu_g + \left\{ \frac{hc a_0^3}{2} \times \left[ \frac{d(\nu_A - \nu_{PL})}{df(\epsilon, n)} \right] \right\}^{1/2} \quad (2)$$

$(\epsilon, n)$  and  $a_0$  can be obtained by the Equation 3 and 4:

$$f(\epsilon, n) = \frac{\epsilon - 1}{2\epsilon + 1} + \frac{n^2 - 1}{2n^2 + 1} \quad (3)$$

$$a_0 = \left( \frac{3M}{4\pi N d} \right)^{1/3} \quad (4)$$

Where,  $\epsilon$  and  $n$  are dielectric constant and refractive index of solvent,  $N$  is Avogadro's number,  $M$  is molar mass, and  $d$  is density of the solvents, respectively. The values of  $(\epsilon, n)$  and  $a_0$  can be estimated by the Equation 3 and 4. The  $\mu_g$  of **P2MPC** (3.97 D) was estimated with the Gaussian 09 package at the level of RB3LYP/6-31G(d, p). The  $\frac{d(\nu_A - \nu_{PL})}{df(\epsilon, n)}$  can be estimated with the solvatochromic experiment data listed in Table S1. With the information above, a linear relationship with the slope of 3905.88 (Correlation = 0.977) was achieved, corresponding to the  $\mu_e$  of 10.50 D.

**Table S1.** The detailed absorption, emission peak and of P2MPC in different solvents

| Solvents          | $\epsilon$ | $n$   | $f(\epsilon, n)$ | $\lambda_A$<br>[nm] | $\lambda_{PL}$<br>[nm] | $\nu_A - \nu_{PL}$<br>[cm <sup>-1</sup> ] |
|-------------------|------------|-------|------------------|---------------------|------------------------|-------------------------------------------|
| Hexane            | 1.9        | 1.375 | 0.0012           | 293                 | 379                    | 7744.5                                    |
| Toluene           | 2.38       | 1.494 | 0.013            | 293                 | 387                    | 8289.9                                    |
| Triethylamine     | 2.42       | 1.401 | 0.048            | 293                 | 396                    | 8877.2                                    |
| Butyl ether       | 3.08       | 1.399 | 0.096            | 293                 | 390                    | 8488.7                                    |
| Isopropyl ether   | 3.88       | 1.368 | 0.145            | 293                 | 394                    | 8749.0                                    |
| Ethyl ether       | 4.34       | 1.352 | 0.167            | 293                 | 396                    | 8877.2                                    |
| Ethyl acetate     | 6.02       | 1.372 | 0.2              | 293                 | 398                    | 9004.1                                    |
| Tetrahydrofuran   | 7.58       | 1.407 | 0.21             | 293                 | 398                    | 9004.1                                    |
| Dichloromethane   | 8.93       | 1.424 | 0.217            | 293                 | 401                    | 9192.0                                    |
| Dimethylformamide | 37         | 1.427 | 0.276            | 293                 | 404                    | 9377.2                                    |

|              |      |       |       |     |     |        |
|--------------|------|-------|-------|-----|-----|--------|
| Acetone      | 20.7 | 1.359 | 0.284 | 293 | 401 | 9192.0 |
| Acetonitrile | 37.5 | 1.344 | 0.305 | 293 | 405 | 9438.3 |

---

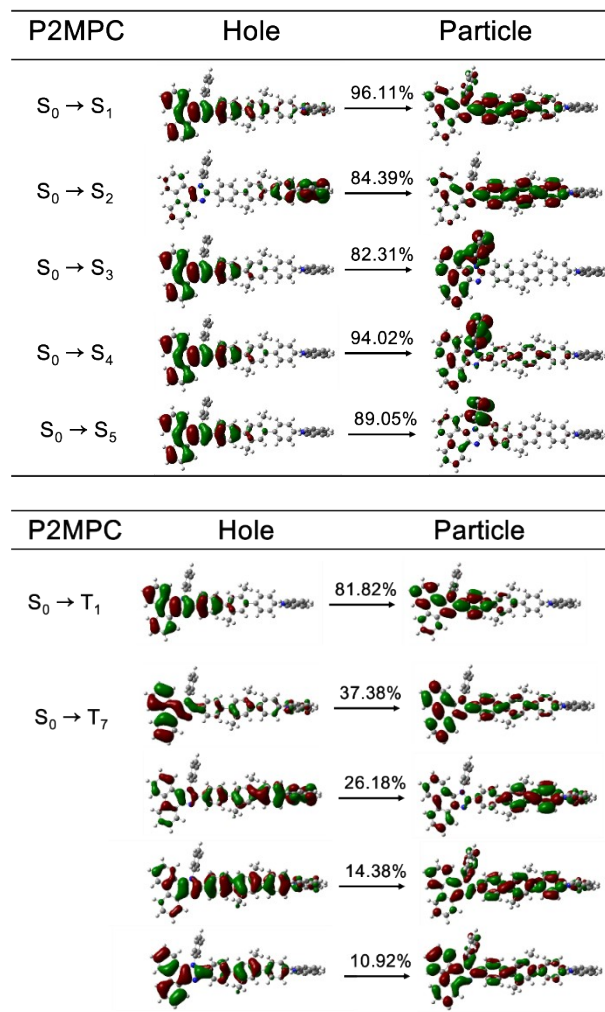

**Fig. S4.** The NTO transition characters of the singlet and triplet states.

**Table S2.** Energy levels of singlet and triplet states and oscillator strengths of singlet states in **P2MPC**

| <b>Excited States</b> | <b>S energy level<br/>[eV]</b> | <b>T energy level<br/>[eV]</b> | <b>S Oscillator Strength</b> |
|-----------------------|--------------------------------|--------------------------------|------------------------------|
| 1                     | 3.4976                         | 2.6625                         | 1.1834                       |
| 2                     | 3.7148                         | 3.0132                         | 0.0352                       |
| 3                     | 3.7214                         | 3.1796                         | 0.0273                       |
| 4                     | 3.847                          | 3.2029                         | 0.0426                       |
| 5                     | 3.9397                         | 3.3414                         | 0.0142                       |
| 6                     | 4.0041                         | 3.3452                         | 0.042                        |
| 7                     | 4.0396                         | 3.4843                         | 0.0057                       |
| 8                     | 4.1192                         | 3.5984                         | 0.0909                       |
| 9                     | 4.1562                         | 3.6789                         | 0                            |
| 10                    | 4.2143                         | 3.7613                         | 0.0361                       |



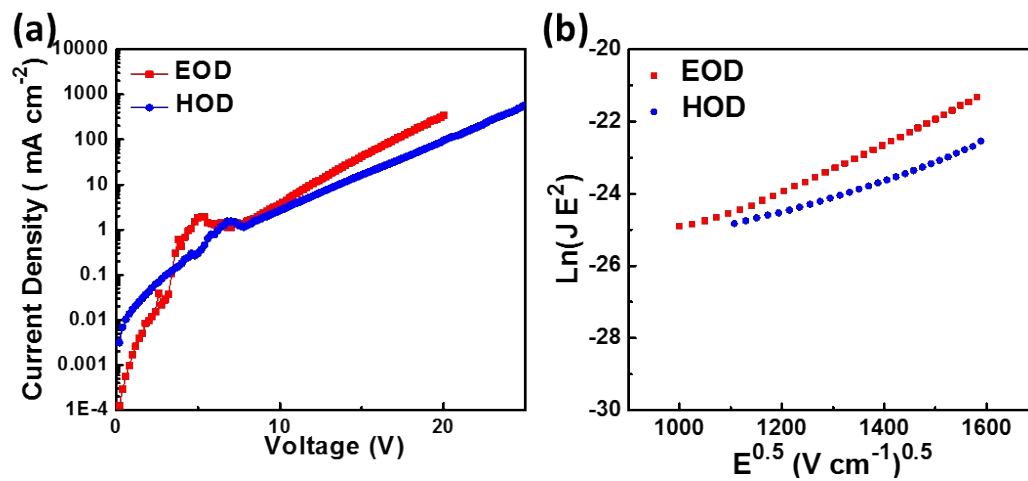

**Fig. S5.** Current density–voltage characteristics (a), and  $\text{Ln}(JE^2)$ – $E^{0.5}$  characteristics (b) of hole- and electron-only devices.

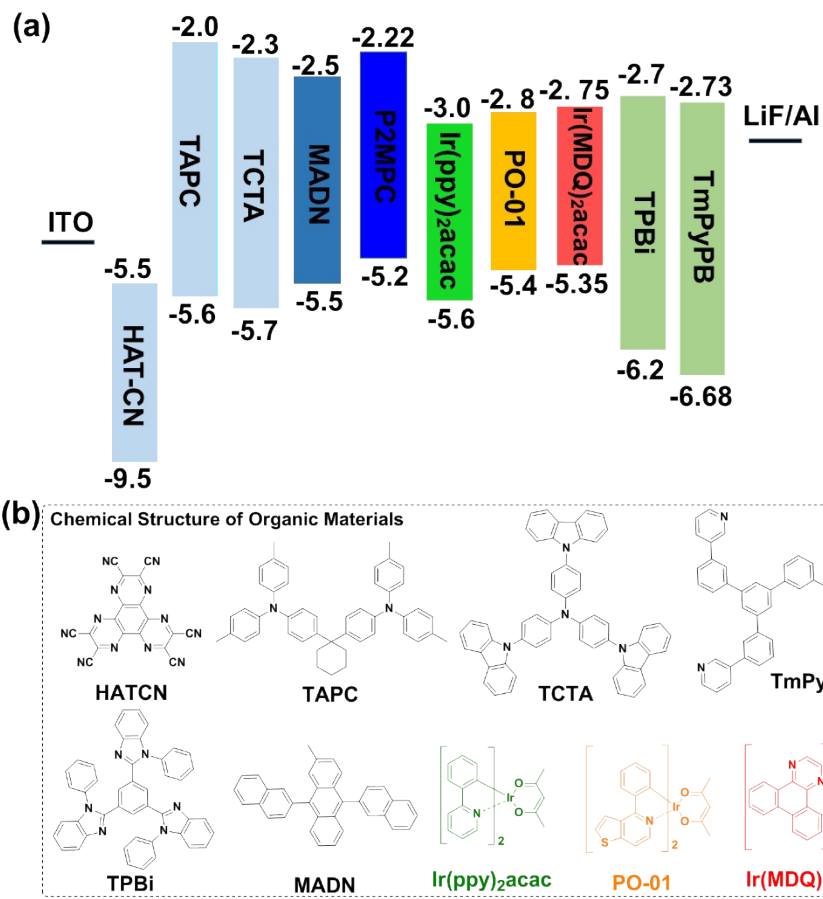

Fig. S6. The energy level diagrams and molecular structures of organic materials used in the devices.

**Table S3.** Summary of EL performance of reported high-performance non-doped deep-blue OLEDs with CIEy $\leq 0.07$ .

| Ref.             | $L_{\max}^a)$<br>[cd m <sup>-2</sup> ] | $EQE_{\max}^a)$<br>[%] | $EQE_{100}^a)$<br>[%] | $EQE_{1000}^a)$<br>[%] | CIE(x,y)              |
|------------------|----------------------------------------|------------------------|-----------------------|------------------------|-----------------------|
| <b>This work</b> | <b>6331</b>                            | <b>7.15</b>            | <b>6.80</b>           | <b>5.65</b>            | <b>(0.157, 0.064)</b> |
| <b>Ref.1</b>     | 5146                                   | 6.4                    | 6.13                  | 5.58                   | (0.151, 0.066)        |
|                  | 5382                                   | 5.87                   | 5.76                  | 5.52                   | (0.148, 0.070)        |
| <b>Ref.2</b>     | -                                      | 5.08                   | 5.00                  | 4.44                   | (0.16, 0.06)          |
|                  | -                                      | 4.47                   | 4.45                  | 4.13                   | (0.16, 0.07)          |
| <b>Ref.3</b>     | 2233                                   | 5.3                    |                       | 4.2                    | (0.16, 0.06)          |
|                  | 2445                                   | 7.1                    |                       | 5.3                    | (0.16, 0.06)          |
| <b>Ref.4</b>     | 3113                                   | 6.57                   | 4.04                  | -                      | (0.17, 0.07)          |
| <b>Ref.5</b>     | 1890                                   | 1.97                   | -                     | -                      | (0.16, 0.06)          |
| <b>Ref.6</b>     | -                                      | 8.9                    | 3.9 <sup>b)</sup>     | -                      | (0.150, 0.060)        |
|                  | 4543                                   | 3.02                   | -                     | -                      | (0.167, 0.056)        |
| <b>Ref.7</b>     | 3602                                   | 1.51                   | -                     | -                      | (0.165, 0.053)        |
|                  | 3342                                   | 1.94                   | -                     | -                      | (0.165, 0.050)        |
| <b>Ref.8</b>     | -                                      | 3.38                   | -                     | -                      | (0.154, 0.063)        |
| <b>Ref.9</b>     | 8951                                   | 5.29                   | -                     | -                      | (0.155, 0.058)        |
| <b>Ref.10</b>    | 2690                                   | 4.18                   |                       |                        | (0.154, 0.042)        |
|                  | 7490                                   | 5.74                   | 5.50                  | 4.80                   | (0.152, 0.054)        |
| <b>Ref.11</b>    | 9163                                   | 4.21                   |                       | 3.83                   | (0.152, 0.057)        |
|                  | 9165                                   | 4.60                   |                       | 4.04                   | (0.154, 0.058)        |
| <b>Ref.12</b>    | 8024                                   | 3.19                   | -                     | -                      | (0.156, 0.054)        |
| <b>Ref.13</b>    | 18 105                                 | 6.33                   | -                     | 6.32                   | (0.151, 0.066)        |
| <b>Ref.14</b>    | -                                      | 4                      | -                     | -                      | (0.157, 0.053)        |
|                  | -                                      | 2.6                    |                       | -                      | (0.158, 0.045)        |
| <b>Ref.15</b>    | -                                      | 4.34                   | 3.9                   | -                      | (0.160, 0.035)        |
|                  | -                                      | 4.78                   | 4.59                  | -                      | (0.159, 0.060)        |
|                  | -                                      | 2.76                   | 2.24                  | -                      | (0.167, 0.070)        |
| <b>Ref.16</b>    | 15560                                  | 4.12                   | -                     | 3.3                    | (0.160, 0.038)        |
|                  | 4916                                   | 6.49                   | -                     | 4.36                   | (0.156, 0.046)        |
|                  | 3822                                   | 6.73                   | -                     | 4.01                   | (0.156, 0.055)        |

<sup>a)</sup>  $L_{\max}$ ,  $EQE_{\max}$ ,  $EQE_{100}$ , and  $EQE_{1000}$  represent the maximum luminance and external quantum efficiencies at the maximum and 100 and 1000 cd m<sup>-2</sup>; <sup>b)</sup> external quantum efficiency at 500 cd m<sup>-2</sup>.

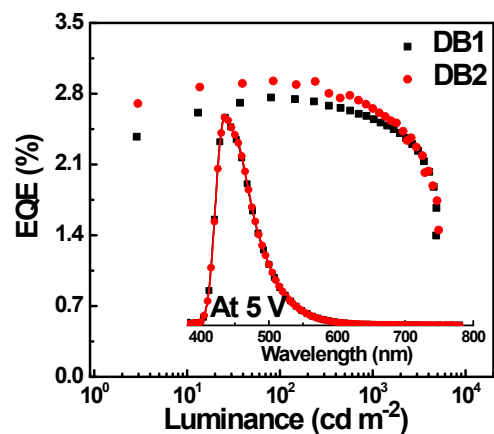

**Fig. S7.** EQE versus luminance characteristics of the devices **DB1** and **DB2** with the structure of ITO/ HATCN (20 nm)/ TAPC (50 nm)/ TCTA (5 nm)/ MADN: **P2MPC** (XX, 20 nm)/ TPBi (10 nm)/ TmPyPB (35 nm)/ LiF (1 nm)/Al (100 nm), where the doping concentrations of 2 and 10 wt% for **DB1** and **DB2**. Inset: the EL spectra at the applied voltage of 5 V.

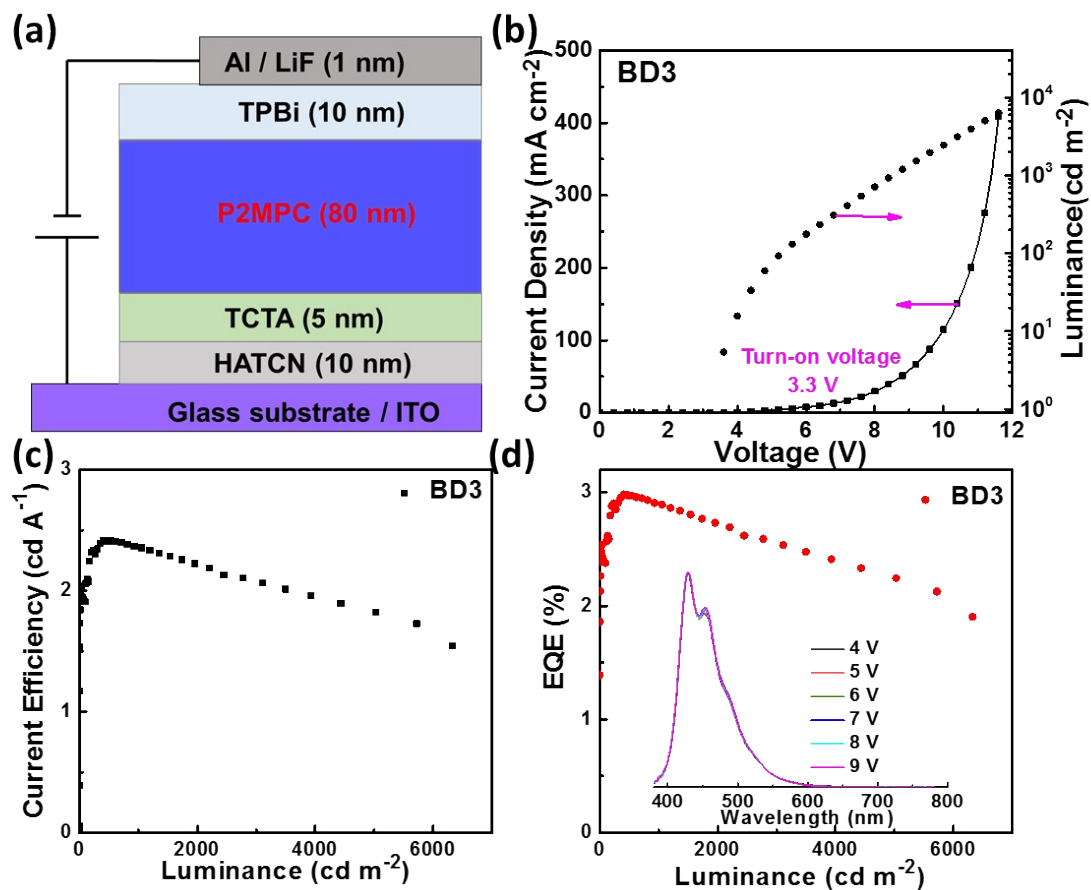

**Fig. S8.** Device configuration and EL performance of the non-doped OLED **BD3**. (a) Device configuration. (b) Current density-voltage-luminance characteristics. (c) Current efficiency as a function of luminance. (d) EQE versus luminance characteristic. Inset: the EL spectra with different applied voltages.

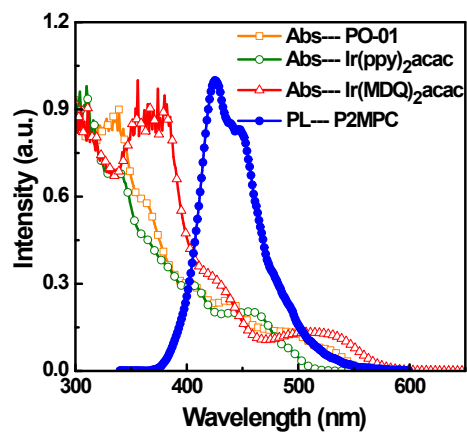

**Fig. S9.** Absorption spectra of Ir(ppy)<sub>2</sub>acac, PO-01 and Ir(MDQ)<sub>2</sub>acac in dichloromethane solution and PL spectrum of **P2MPC** in film.

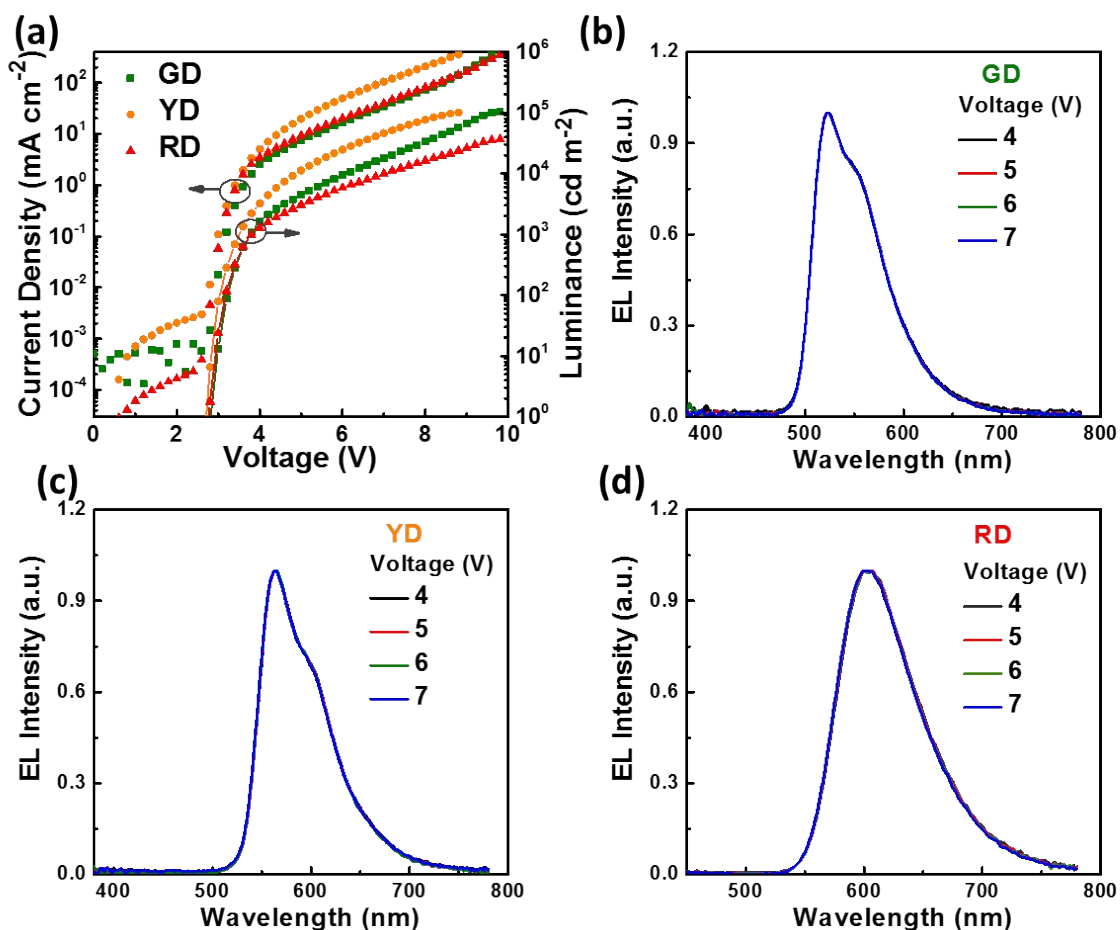

**Fig. S10.** (a) Current density-voltage-luminance characteristics of the devices **GD**, **YD**, and **RD**. (b) The EL spectra of the device **GD** at the different applied voltages. (c) The EL spectra of the device **YD** at the different applied voltages. (d) The EL spectra of the device **RD** at the different applied voltages. The device structure of **GD** is ITO/ HATCN (20 nm)/ TAPC (50 nm)/ TCTA (5 nm)/ **P2MPC**: Ir(ppy)<sub>2</sub>acac (10 wt%, 20 nm)/ TPBi (45 nm)/ LiF (1 nm)/Al (100 nm). The device structure of **YD** is ITO/ PEDOT:PSS (30 nm)/ TAPC (40 nm)/ TCTA (5 nm)/ **P2MPC**: PO-01 (5 wt%, 20 nm)/ TPBi (10 nm)/ TmPyPB (30 nm)/ LiF (1 nm)/Al (100 nm). The device structure of **RD** is ITO/ HATCN (20 nm)/ TAPC (50 nm)/ TCTA (5 nm)/ **P2MPC**: Ir(MDQ)<sub>2</sub>acac (5 wt%, 20 nm)/ TPBi (45 nm)/ LiF (1 nm)/Al (100 nm).

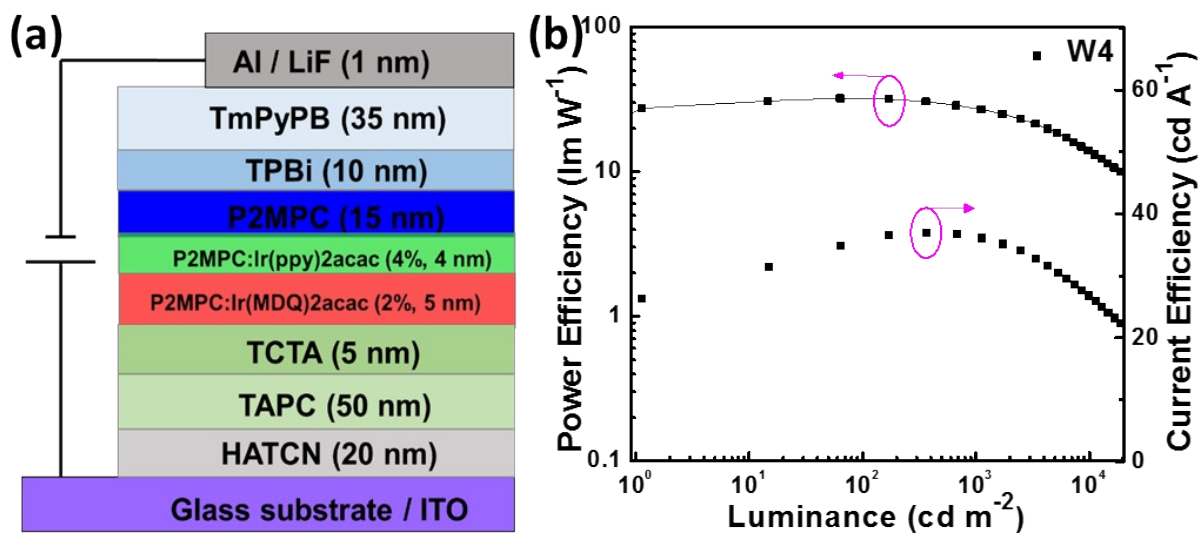

**Fig. S11.** (a) Device configuration of the device W4. (b) Power efficiency and current efficiency as a function of luminance based on the device W4.



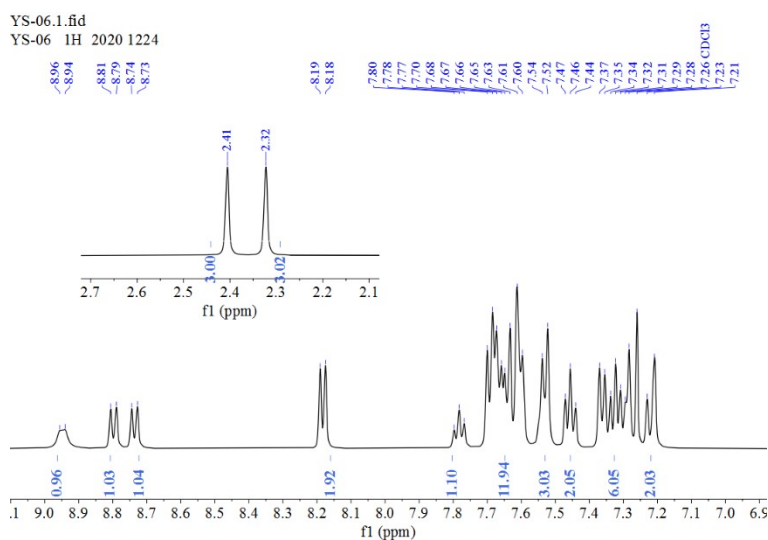

**Fig. S12.**  $^1\text{H}$  NMR spectrum of the target compound **P2MPC**.

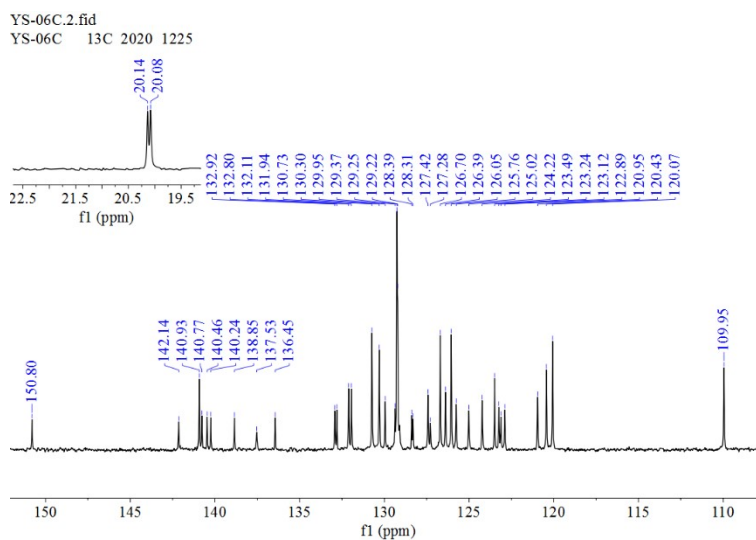

**Fig. S13.**  $^{13}\text{C}$  NMR spectrum of the target compound **P2MPC**.

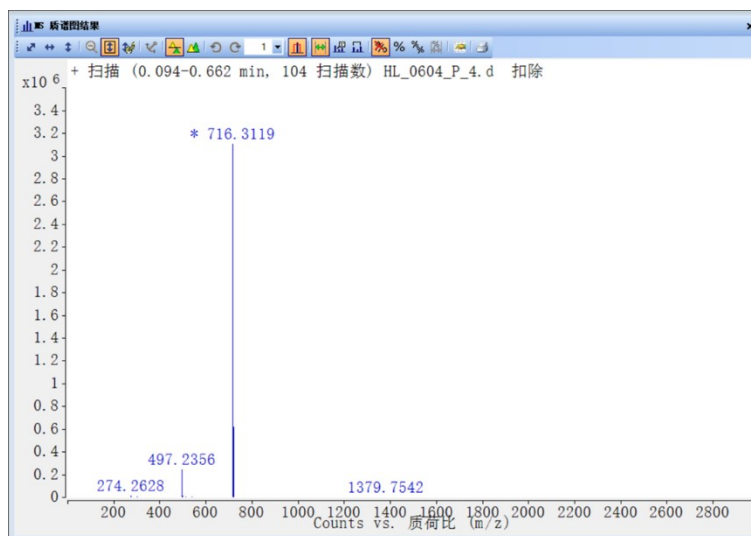

**Fig. S14.** HRMS spectrum of the target compound **P2MPC**.

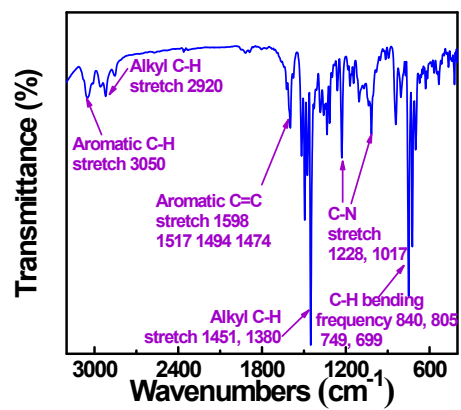

Fig. S15. Infrared (IR) spectrum of the target compound **P2MPC**.

### Detailed Study of RISC Process for P2MPC

The possibility of thermally activated delayed fluorescence (TADF) process can be ruled out due to the nanosecond-scale single-exponential decay lifetime and large  $\Delta E_{ST}$  (Fig. 1b, S2b), while the good linear correlation between luminance and current density implies that the triplet-triplet annihilation (TTA) process is not the main emission mechanism for the device BD (Fig. S16b). According to the natural transition orbitals (NTOs) of P2MPC, the excited states of  $S_1$ , and  $T_7$  show HLCT transition character, which ensure the existence of high-lying reverse intersystem crossing (hRISC) process. Meanwhile, from the analysis of Lippert-Mataga solvatochromic model and nanosecond-scale single-exponential decay lifetimes in different solvents, the HLCT character of P2MPC can be confirmed. Furthermore, as shown in Fig. S16a, large  $\Delta E_{ST}$  of 0.8351 eV between  $S_1$  and  $T_1$ , and small energy differences of 0.0133 eV between  $S_1$  and  $T_7$  can effectively enhance the hRISC rate, making more singlet excitons be generated via hRISC channel.

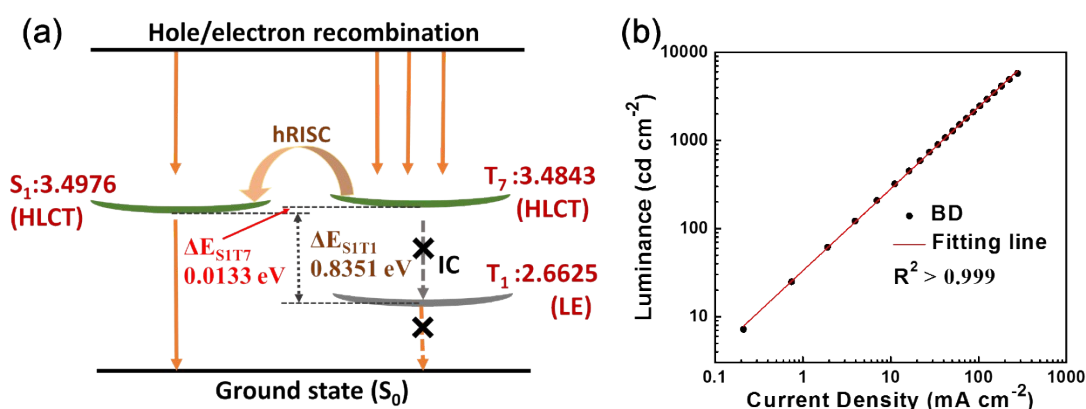

**Fig. S16.** (a) Probable emission mechanism of HLCT material **P2MPC**. S: singlet state; T: triplet state; LE: local excited state;  $\Delta E_{ST}$ : singlet–triplet energy splitting; IC: internal conversion; hRISC: high-lying reverse intersystem crossing. (b) Luminance versus current density curve of the device BD. The fitting line of  $y = 0.92938x + 1.52109$ .

## References

- [1] Ye, S.; Wang, Y.; Guo, R.; Zhang, Q.; Lv, X.; Duan, Y.; Leng, P.; Sun, S.; Wang, L. Asymmetric anthracene derivatives as multifunctional electronic materials for constructing simplified and efficient non-doped homogeneous deep blue fluorescent OLEDs. *Chem. Eng. J.* **2020**, *393*, 124694.
- [2] Zhu, Z.-L.; Ni, S.-F.; Chen, W.-C.; Chen, M.; Zhu, J.-J.; Yuan, Y.; Tong, Q.-X.; Wong, F.-L.; Lee, C.-S. Tuning electrical properties of phenanthroimidazole derivatives to construct multifunctional deep-blue electroluminescent materials. *J. Mater. Chem. C* **2018**, *6*, 3584-3592.
- [3] Zheng, Y.; Zhu, X.; Ni, Z.; Wang, X.; Zhong, Z.; Feng, X. J.; Zhao, Z.; Lu, H. Bipolar Molecules with Hybridized Local and Charge-Transfer State for Highly Efficient Deep-Blue Organic Light-Emitting Diodes with EQE of 7.4% and CIE<sub>y</sub> ~ 0.05. *Adv. Opt. Mater.* **2021**, *9*, 2100965.
- [4] Xue, S.; Qiu, X.; Ying, S.; Lu, Y.; Pan, Y.; Sun, Q.; Gu, C.; Yang, W. Highly Efficient Nondoped Near-Ultraviolet Electroluminescence with an External Quantum Efficiency Greater Than 6.5% Based on a Carbazole-Triazole Hybrid Molecule with High and Balanced Charge Mobility. *Adv. Opt. Mater.* **2017**, *5*, 1700747.
- [5] Jhulki, S.; Mishra, A. K.; Ghosh, A.; Chow, T. J.; Moorthy, J. N. Deep blue-emissive bifunctional (hole-transporting + emissive) materials with CIE<sub>y</sub> ~ 0.06 based on a 'U'-shaped phenanthrene scaffold for application in organic light-emitting diodes. *J. Mater. Chem. C* **2016**, *4*, 9310-9315.
- [6] Huh, J.-S.; Ha, Y. H.; Kwon, S.-K.; Kim, Y.-H.; Kim, J.-J. Design Strategy of Anthracene-Based Fluorophores toward High-Efficiency Deep Blue Organic Light-Emitting Diodes Utilizing Triplet-Triplet Fusion. *ACS Appl. Mater. Interfaces* **2020**, *12*, 15422-15429.
- [7] Gao, Z.; Wang, Z.; Shan, T.; Liu, Y.; Shen, F.; Pan, Y.; Zhang, H.; He, X.; Lu, P.; Yang, B.; Ma, Y. High-efficiency deep blue fluorescent emitters based on phenanthro[9,10-d]imidazole substituted carbazole and their applications in organic light emitting diodes. *Org. Electron.* **2014**, *15*, 2667-2676.
- [8] Chen, W.-C.; Yuan, Y.; Ni, S.-F.; Tong, Q.-X.; Wong, F.-L.; Lee, C.-S. Achieving efficient violet-blue electroluminescence with CIE<sub>y</sub> < 0.06 and EQE > 6% from naphthyl-linked phenanthroimidazole-carbazole hybrid fluorophores. *Chem. Sci.* **2017**, *8*, 3599-3608.
- [9] Wang, Z.-Y.; Zhao, J.-W.; Liu, B.; Cao, C.; Li, P.; Tong, Q.-X.; Tao, S.-L. Universal materials for high performance violet-blue OLEDs (CIE<sub>y</sub> < 0.06) and PhOLEDs. *Dyes Pigm.* **2019**, *163*, 213-220.
- [10] Qiu, X.; Ying, S.; Wang, C.; Hanif, M.; Xu, Y.; Li, Y.; Zhao, R.; Hu, D.; Ma, D.; Ma, Y. Novel 9,9-dimethylfluorene-bridged D-π-A-type fluorophores with a hybridized local and charge-transfer excited state for

deep-blue electroluminescence with CIE<sub>y</sub> ~ 0.05. *J. Mater. Chem. C* **2019**, *7*, 592-600.

[11] Zhao, J.; Liu, B.; Wang, Z.; Tong, Q.; Du, X.; Zheng, C.; Lin, H.; Tao, S.; Zhang, X. EQE Climbing Over 6% at High Brightness of 14350 cd/m<sup>2</sup> in Deep-Blue OLEDs Based on Hybridized Local and Charge-Transfer Fluorescence. *ACS Appl. Mater. Interfaces* **2018**, *10*, 9629-9637.

[12] Zhou, H.; Yin, M.; Zhao, Z.; Miao, Y.; Jin, X.; Huang, J.; Gao, Z.; Wang, H.; Su, J.; Tian, H. Novel carbazole-based multifunctional materials with a hybridized local and charge-transfer excited state acting as deep-blue emitters and phosphorescent hosts for highly efficient organic light-emitting diodes. *J. Mater. Chem. C* **2021**, *9*, 5899-5907.

[13] Liu, B.; Yu, Z.-W.; He, D.; Zhu, Z.-L.; Zheng, J.; Yu, Y.-D.; Xie, W.-F.; Tong, Q.-X.; Lee, C.-S. Ambipolar D–A type bifunctional materials with hybridized local and charge-transfer excited state for high performance electroluminescence with EQE of 7.20% and CIE<sub>y</sub> ~ 0.06. *J. Mater. Chem. C* **2017**, *5*, 5402-5410.

[14] Xiao, S.; Zhang, S.-T.; Gao, Y.; Yang, X.; Liu, H.; Li, W.; Yang, B. Efficient and stable deep-blue narrow-spectrum electroluminescence based on hybridized local and charge-transfer (HLCT) state. *Dyes Pigm.* **2021**, *193*, 109482.

[15] Han, P.; Lin, C.; Ma, D.; Qin, A.; Tang, B. Z. Violet-Blue Emitters Featuring Aggregation-Enhanced Emission Characteristics for Nondoped OLEDs with CIE<sub>y</sub> Smaller than 0.046. *ACS Appl. Mater. Interfaces* **2020**, *12*, 46366-46372.

[16] Li, Z.; Xie, N.; Xu, Y.; Li, C.; Mu, X.; Wang, Y. Fluorine-Substituted Phenanthro[9,10-d]imidazole Derivatives with Optimized Charge-Transfer Characteristics for Efficient Deep-Blue Emitters. *Org. Mater.* **2020**, *02*, 011-019.
